# Supplementary material for: Assessment of a Novel Photocatalytic TiO2-Zirconia Ultrafiltration Membrane and Combination with Solar Photo-Fenton Tertiary Treatment of Urban Wastewater
Source: MDPI journal article supplement (doi:10.3390/catal12050552), 2022-05-18
Supplement: s1 [file s1]

## Support information

**Table S1.** Composition of Urban Wastewater Treatment Plant Effluent.

| UWWTP effluent (EDAR 'El Bobar' Almería, Spain) |        |                               |        |
|-------------------------------------------------|--------|-------------------------------|--------|
| Cations                                         | [mg/L] | Anions                        | [mg/L] |
| Ca <sup>2+</sup>                                | 81     | SO <sub>4</sub> <sup>2+</sup> | 148    |
| Mg <sup>2+</sup>                                | 48     | Cl <sup>-</sup>               | 489    |
| K <sup>+</sup>                                  | 30     | NO <sub>3</sub> <sup>-</sup>  | 5      |
| Na <sup>+</sup>                                 | 314    |                               |        |
| Conductivity [mS/cm]                            | 2.7    |                               |        |
| pH                                              | 8.0    |                               |        |
| TC [mg/L]                                       | 30.0   |                               |        |
| TSS [mg/L]                                      | 60.0   |                               |        |

**Table S2.** Schematic overview of molecular structures of selected MCs.

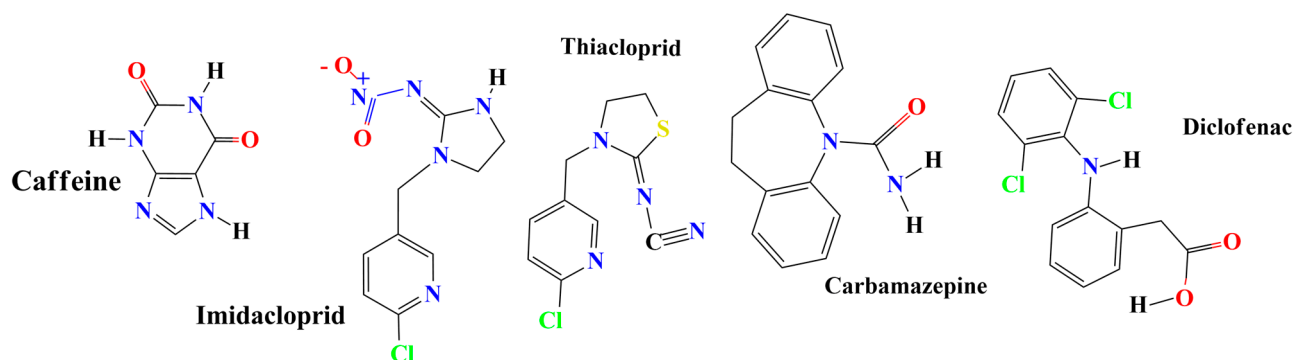

Schematic overview of molecular structures the selected MCs (CAF, IMI, THI, CBZ and DCF). Molecular charge is shown in red for negative, moderate negative for yellow, green for neutral and blue for positive for the applicable atoms.

**Table S3.** Molecular weight, UPLC column retention time, LOQ and maximum contaminant absorption.

| Name | Molecular Weight [g/mol] | t <sub>R</sub> [min] | LOQ [µg/L] | Absorption λ [nm] |
|------|--------------------------|----------------------|------------|-------------------|
| CAF  | 194.2                    | 3.5                  | 5          | 273               |
| IMI  | 259.7                    | 7.9                  | 5          | 273               |
| THI  | 252.7                    | 9.6                  | 5          | 213               |
| CBZ  | 236.3                    | 10.9                 | 5          | 267               |
| DCF  | 318.1                    | 14.0                 | 5          | 285               |

**Table S4.** Overview of oxidation treatments and their parameters.

|                 | Volume      | # | Bicarbonates [mg/L] | Iron     | pH | Iron [mM] | EDDS [mM] | Fe:EDDS ratio | H <sub>2</sub> O <sub>2</sub> [mM] |
|-----------------|-------------|---|---------------------|----------|----|-----------|-----------|---------------|------------------------------------|
| Solar Simulator | Permeate    | 1 | <75                 | Fe (III) | 7  | 0.10      | 0.10      | 1:1           | 1.50                               |
| Solar Simulator | Concentrate | 2 | <75                 | Fe (III) | 7  | 0.10      | 0.10      | 1:1           | 1.50                               |
| Solar Simulator | Permeate    | 3 | 720                 | Fe (III) | 8  | 0.10      | 0.10      | 1:1           | 1.50                               |
| Solar Simulator | Concentrate | 4 | 720                 | Fe (III) | 8  | 0.10      | 0.10      | 1:1           | 1.50                               |

**Table S5.** Composition of natural water (Tabernas, Spain).

| Natural water (Tabernas , Spain) |        |                               |        |
|----------------------------------|--------|-------------------------------|--------|
| Cations                          | [mg/L] | Anions                        | [mg/L] |
| Ca <sup>2+</sup>                 | 29     | SO <sub>4</sub> <sup>2+</sup> | 130    |
| Mg <sup>2+</sup>                 | 47     | Cl <sup>-</sup>               | 186    |
| K <sup>+</sup>                   | 7      | NO <sub>3</sub> <sup>-</sup>  | 10     |
| Na <sup>+</sup>                  | 390    |                               |        |
| Conductivity [mS/cm]             |        |                               | 2.7    |
| pH                               |        |                               | 7.8    |
| TC [mg/L]                        |        |                               | 174.2  |
